# Supplementary material
Source: Springer Nature journal article supplement (https://www.springermedizin.de/resource/supplementary/12890_2008_135_MOESM2_ESM.pdf/9506080)
Supplement: MOESM2 [file 9506080]

URECA

Allergic Families Cohort

Non-Allergic Families Cohort

1850  
Pregnant Women

Screened

240  
Pregnant Women

889  
Pregnant Women

Eligible

111  
Pregnant Women

776  
Pregnant Women

Consented

70  
Pregnant Women

26  
Pregnant Women

Lost to  
Follow-up

2  
Pregnant Women

750  
Newborns

Births

68  
Newborns

560  
Newborns

Eligible  
and Enrolled

49  
Newborns
